# Supplementary material
Source: PubMed Central journal article supplement (PMC1304771)
Supplement: biophysj_87_5_2976__1.pdf [file biophysj_87_5_2976__1.pdf]

SUPPLEMENTAL MATERIAL

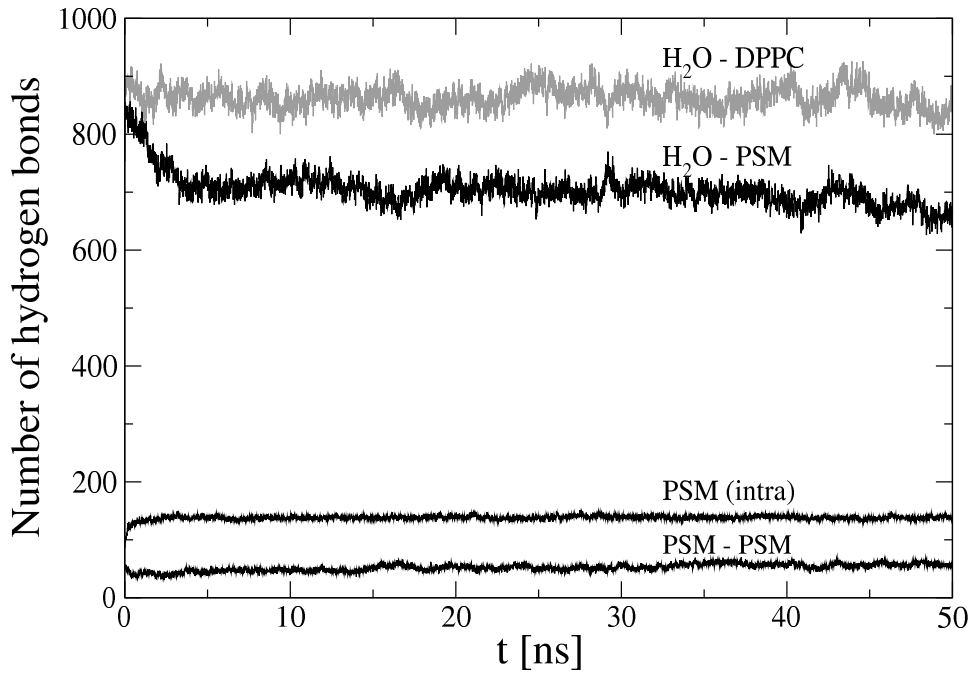

FIG. S-1 Number of different types of hydrogen bonds as a function of time.

TABLE S-I Intermolecular hydrogen bonds: H<sub>2</sub>O ··· PSM.

| Bond                                          | #N               | %     | $t_{1/2}$ [ns] |
|-----------------------------------------------|------------------|-------|----------------|
| all                                           | $711.5 \pm 21.1$ | 100.0 | –              |
| H <sub>2</sub> O···O <sub>P<sub>c</sub></sub> | $238.3 \pm 7.8$  | 33.5  | 0.013          |
| H <sub>2</sub> O···O <sub>P<sub>d</sub></sub> | $233.8 \pm 8.0$  | 32.9  | 0.013          |
| H <sub>2</sub> O···O <sub>P<sub>b</sub></sub> | $64.6 \pm 6.2$   | 9.1   | 0.009          |
| H <sub>2</sub> O···H <sub>NH</sub>            | $57.7 \pm 5.4$   | 8.1   | 0.185          |
| H <sub>2</sub> O···O <sub>OH</sub>            | $55.4 \pm 6.3$   | 7.8   | 0.010          |
| H <sub>2</sub> O···O <sub>PA</sub>            | $37.9 \pm 5.5$   | 5.3   | 0.009          |
| H <sub>2</sub> O···H <sub>OH</sub>            | $1.4 \pm 1.1$    | 0.2   | 0.008          |

TABLE S-II Intermolecular hydrogen bonds: H<sub>2</sub>O ··· DPPC.

| Bond                                                   | #N               | %     | $t_{1/2}$ [ns] |
|--------------------------------------------------------|------------------|-------|----------------|
| all                                                    | $862.8 \pm 19.8$ | 100.0 | –              |
| H <sub>2</sub> O ··· O <sub>P<sub>d</sub></sub>        | $218.4 \pm 7.6$  | 25.3  | 0.009          |
| H <sub>2</sub> O ··· O <sub>P<sub>c</sub></sub>        | $217.8 \pm 7.4$  | 25.2  | 0.009          |
| H <sub>2</sub> O ··· O <sub><math>\beta</math>2</sub>  | $207.2 \pm 7.8$  | 24.0  | 0.020          |
| H <sub>2</sub> O ··· O <sub><math>\beta</math>1</sub>  | $82.5 \pm 7.4$   | 9.6   | 0.010          |
| H <sub>2</sub> O ··· O <sub>P<sub>b</sub></sub>        | $65.7 \pm 6.3$   | 7.6   | 0.007          |
| H <sub>2</sub> O ··· O <sub><math>\alpha</math>2</sub> | $31.5 \pm 5.4$   | 3.6   | 0.009          |
| H <sub>2</sub> O ··· O <sub>P<sub>a</sub></sub>        | $26.1 \pm 4.6$   | 3.0   | 0.006          |
| H <sub>2</sub> O ··· O <sub><math>\alpha</math>1</sub> | $13.7 \pm 3.6$   | 1.6   | 0.007          |
